# Supplementary material
Source: HighWire-hosted journal article supplement (https://bmjopen.bmj.com/content/7/2/e012156)

## Appendix 2

Meta analyses of adherence rate level among PARS participants (only clinical trials)

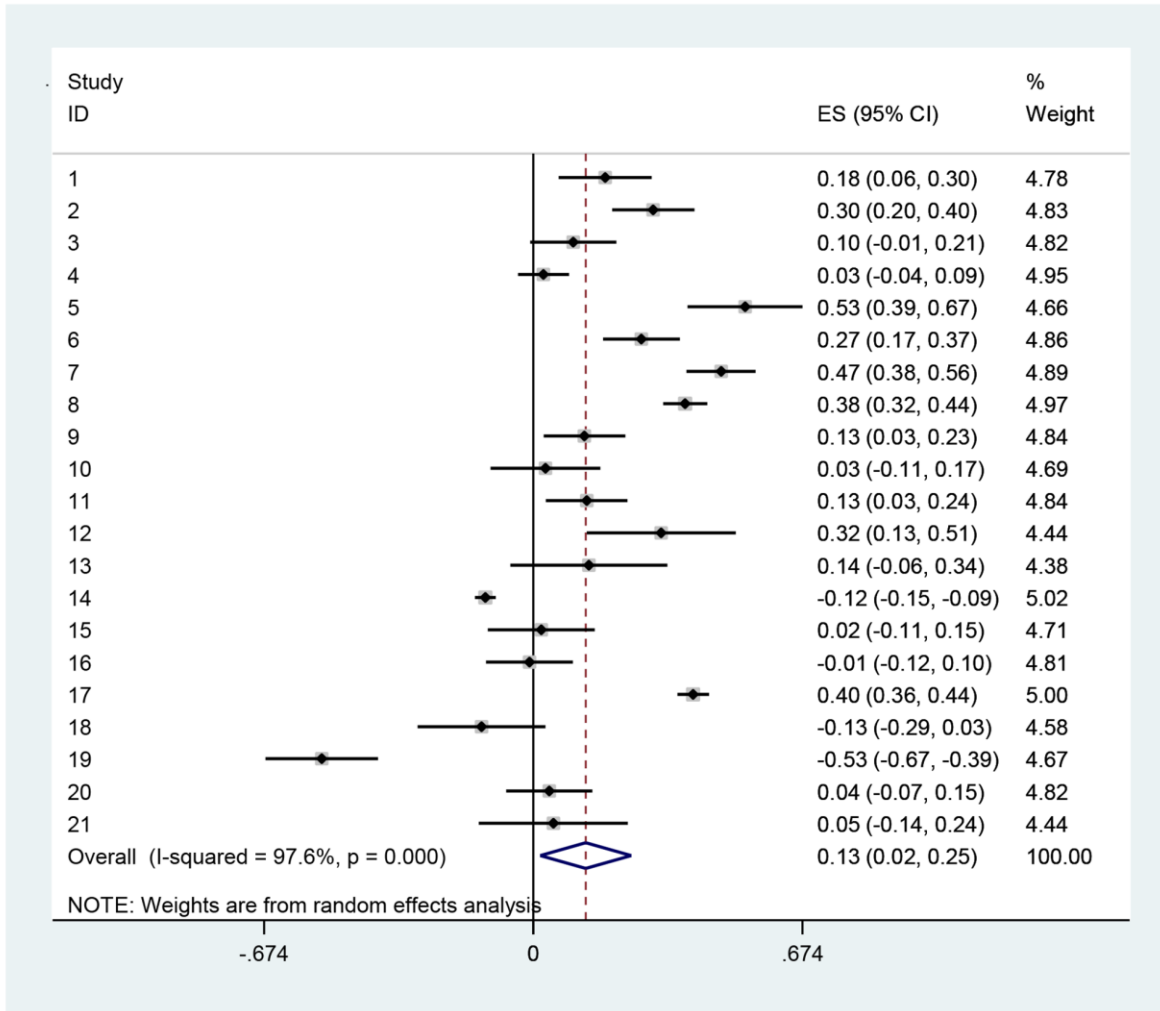

Supplement: inline-supplementary-material-3 [file inline-supplementary-material-3.pdf]
